# Supplementary material
Source: PubMed Central journal article supplement (PMC6813554)
Supplement: oc9b00551_si_002.pdf [file oc9b00551_si_002.pdf]

Control

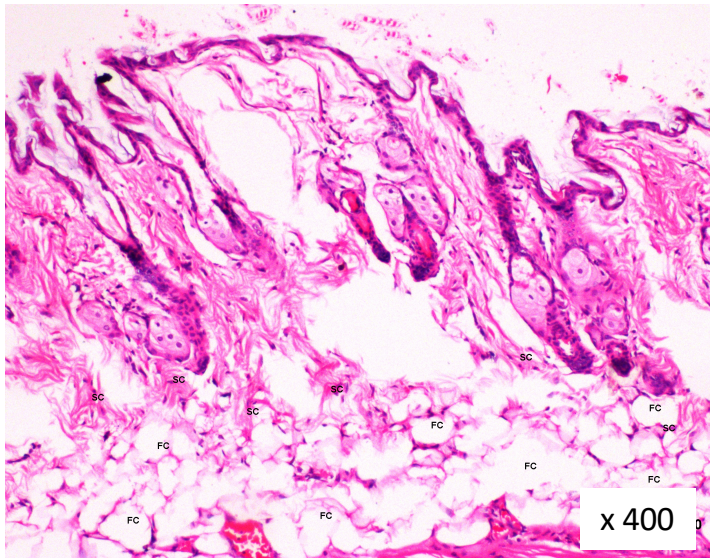

Day 7

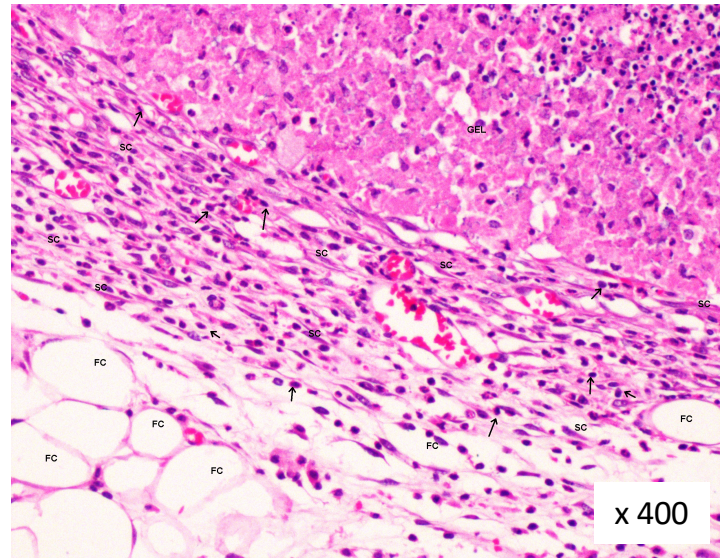

Day 14

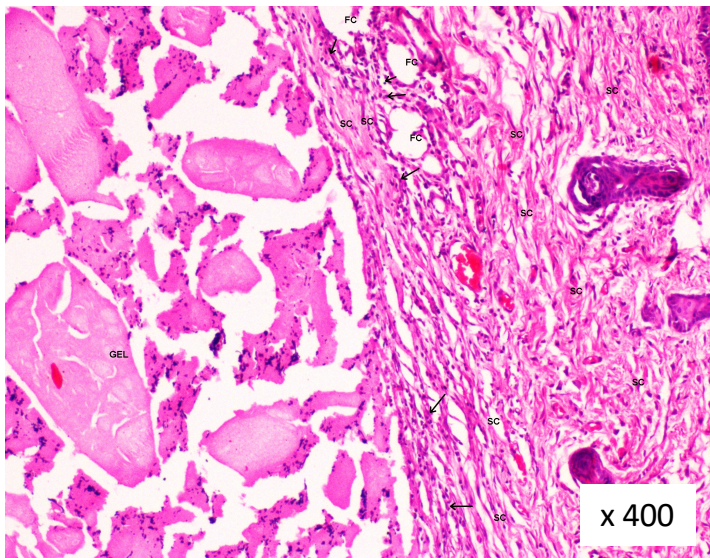

Day 21

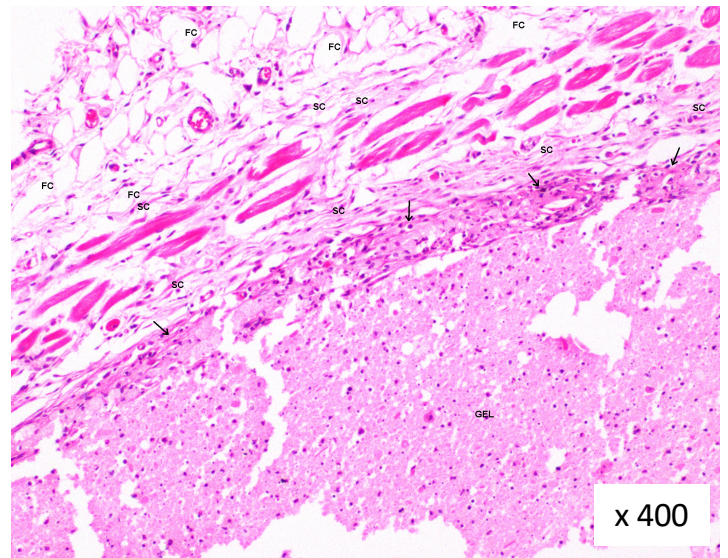

**Data Figure ES1.** H&E staining of gel and surrounding tissue retrieved after 7, 14 and 21 days of subcutaneous injection of A13 gel and control skin tissues from mice show infiltration of immune cells on day 7 that gets cleared by day 14 and 21, thereby validating biocompatible nature of gel. SC: Stromal cells, FC: Fat cells. Arrow indicates leukocytes. All images were taken at 400X magnification.

Control

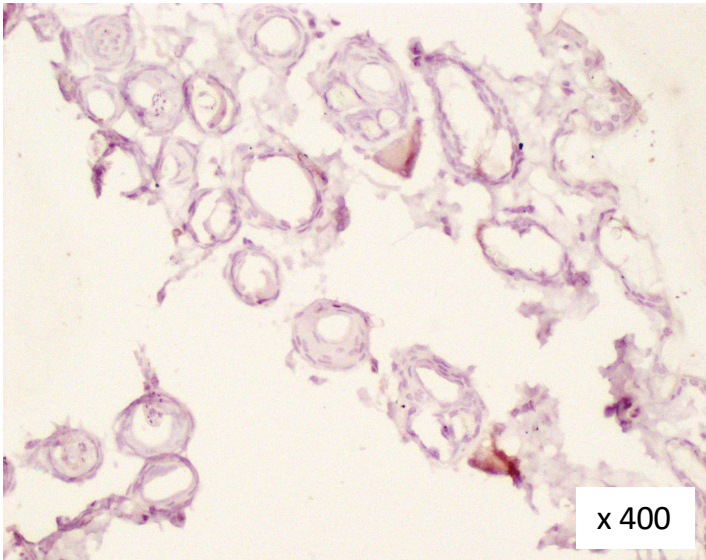

Day 7

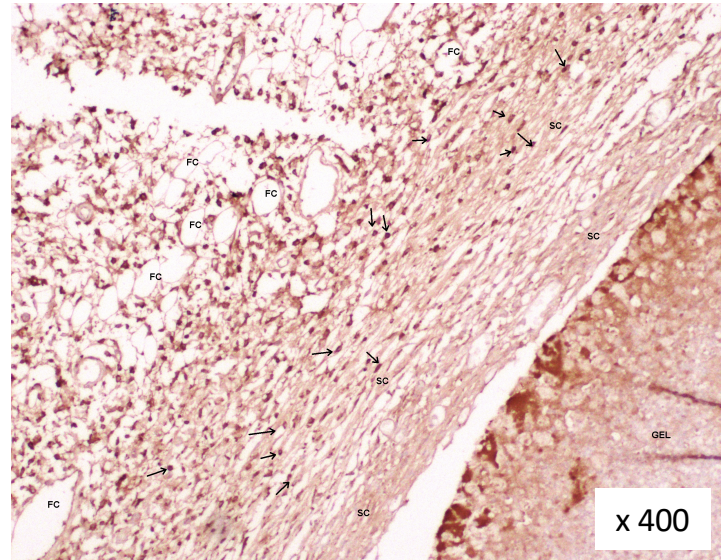

Day 14

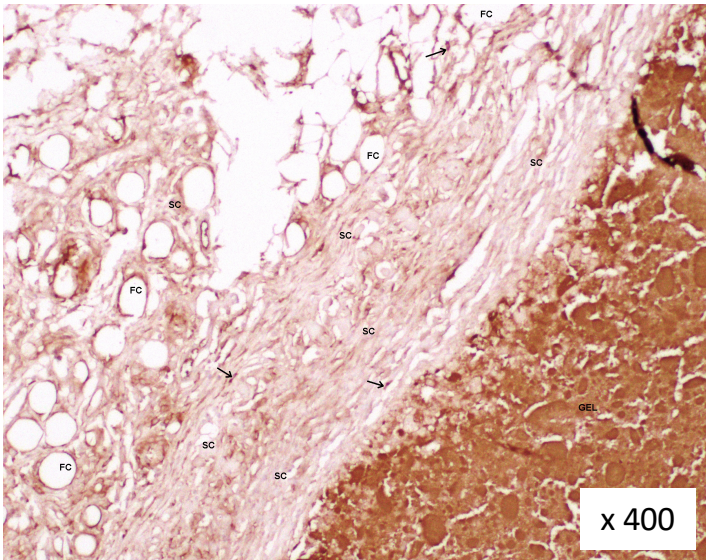

Day 21

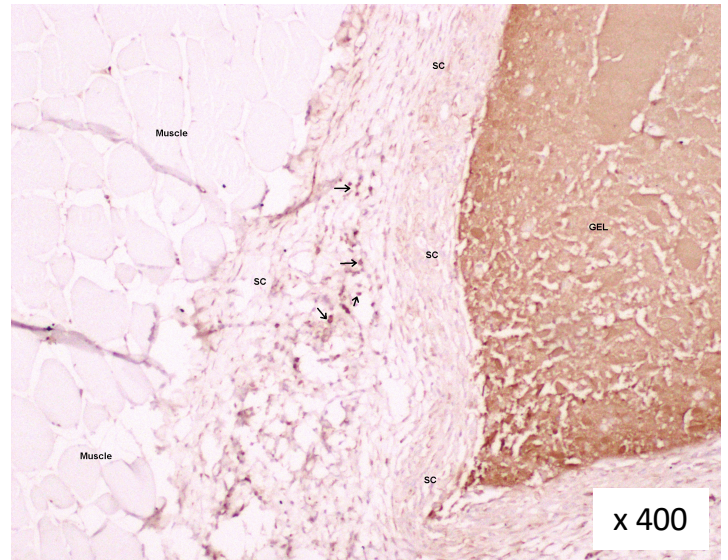

**Data Figure ES2.** CD45 staining of gel and surrounding tissue retrieved after 7, 14 and 21 days of subcutaneous injection of A13 gel and control skin tissues from mice show infiltration of immune cells on day 7 that gets cleared by day 14 and 21, thereby validating biocompatible nature of gel. SC: Stromal cells, FC: Fat cells. Arrow indicates leukocytes. All images were taken at 400X magnification.

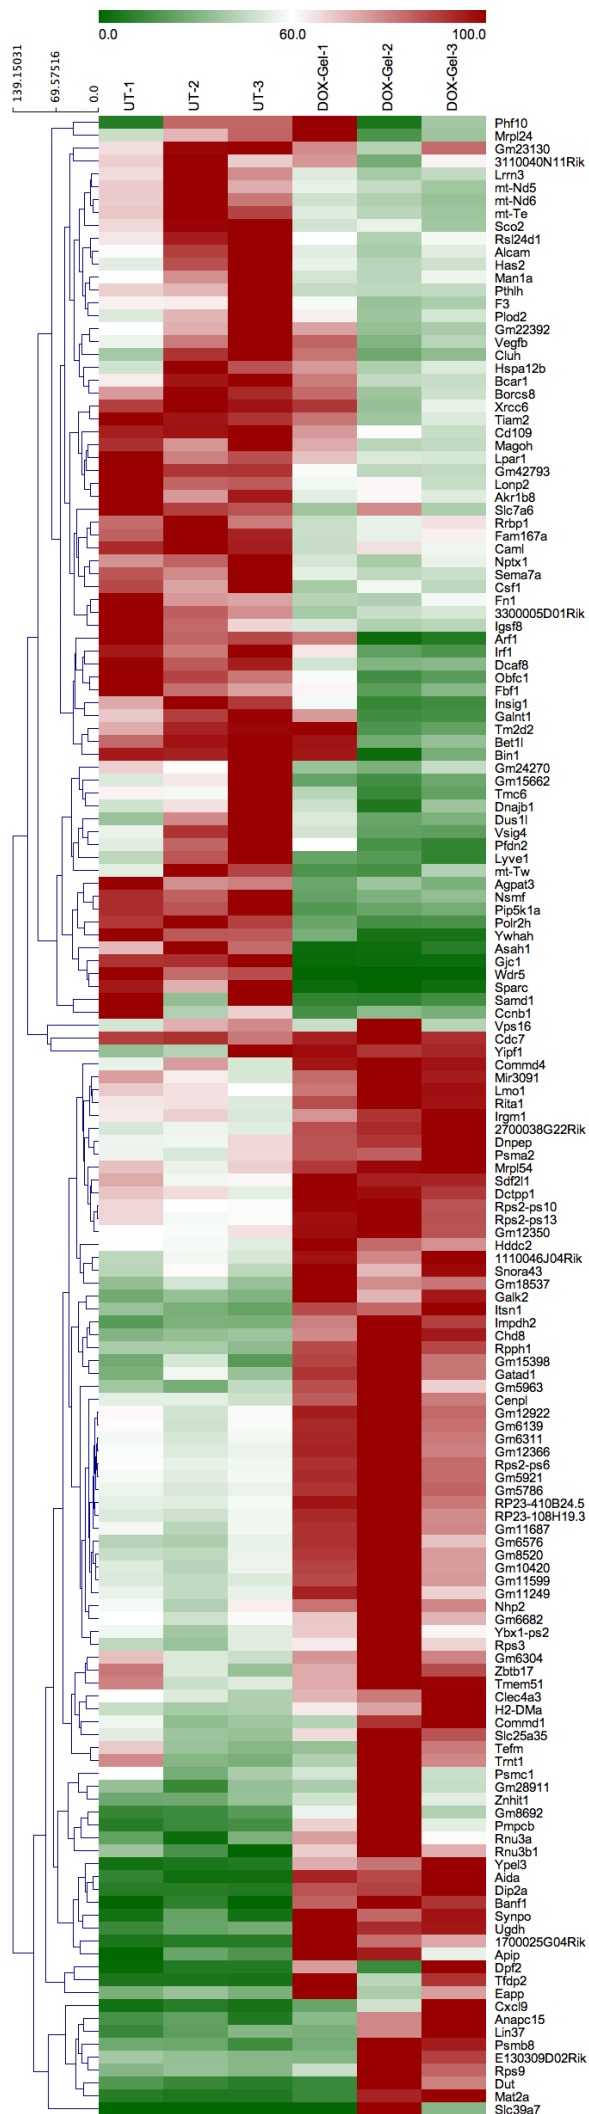

**Data Figure ES3.** Heat map showing differential gene expression on transcriptomic analysis of DOX-Gel treated tumors as compared to untreated (UT) tumors.

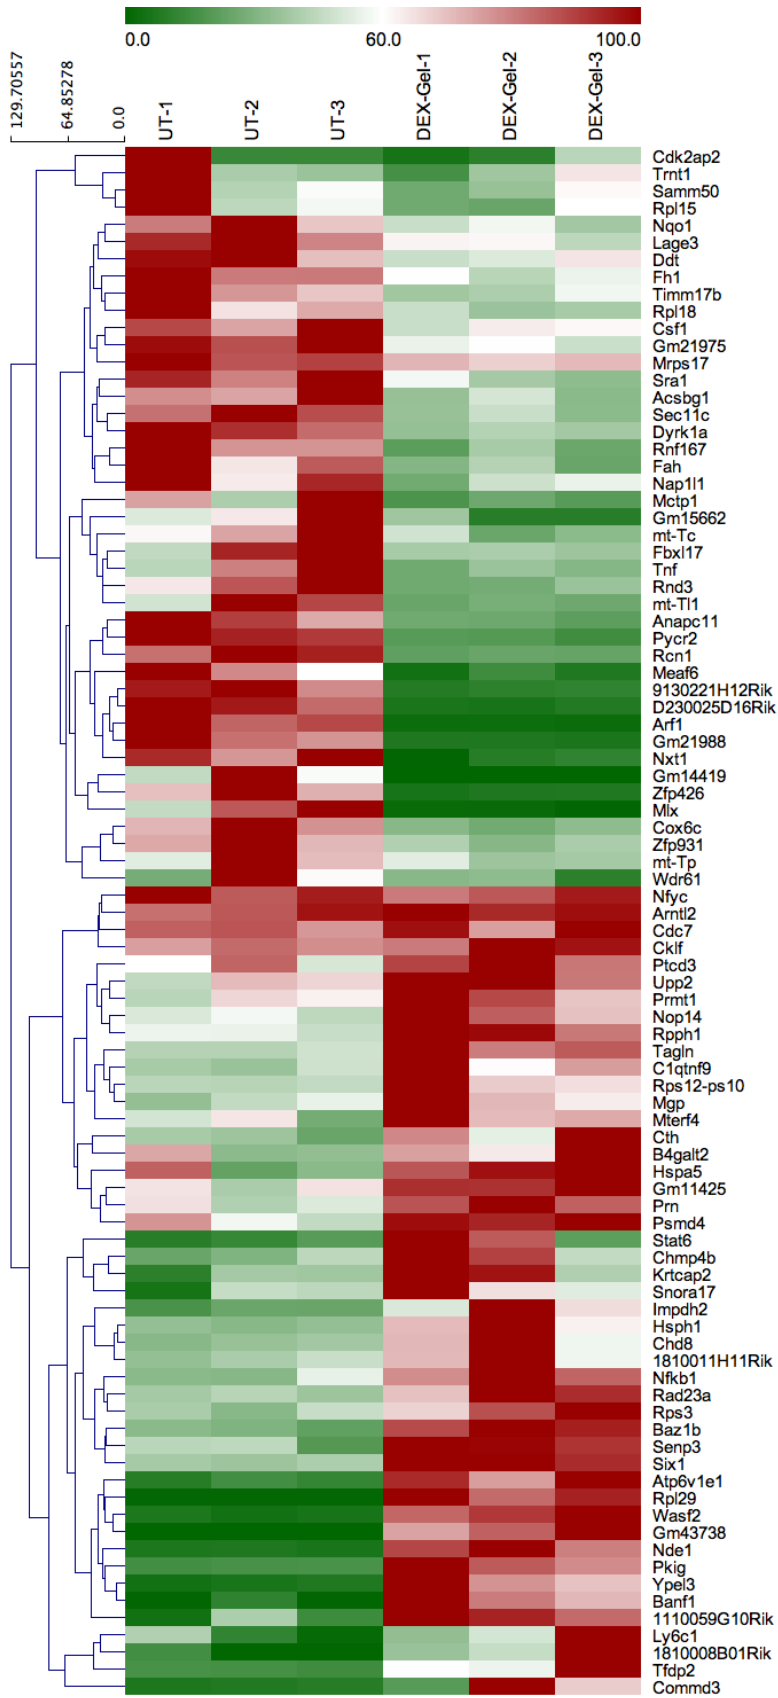

**Data Figure ES4.** Heat map showing differential gene expression on transcriptomic analysis of DEX-Gel treated tumors as compared to untreated (UT) tumors.

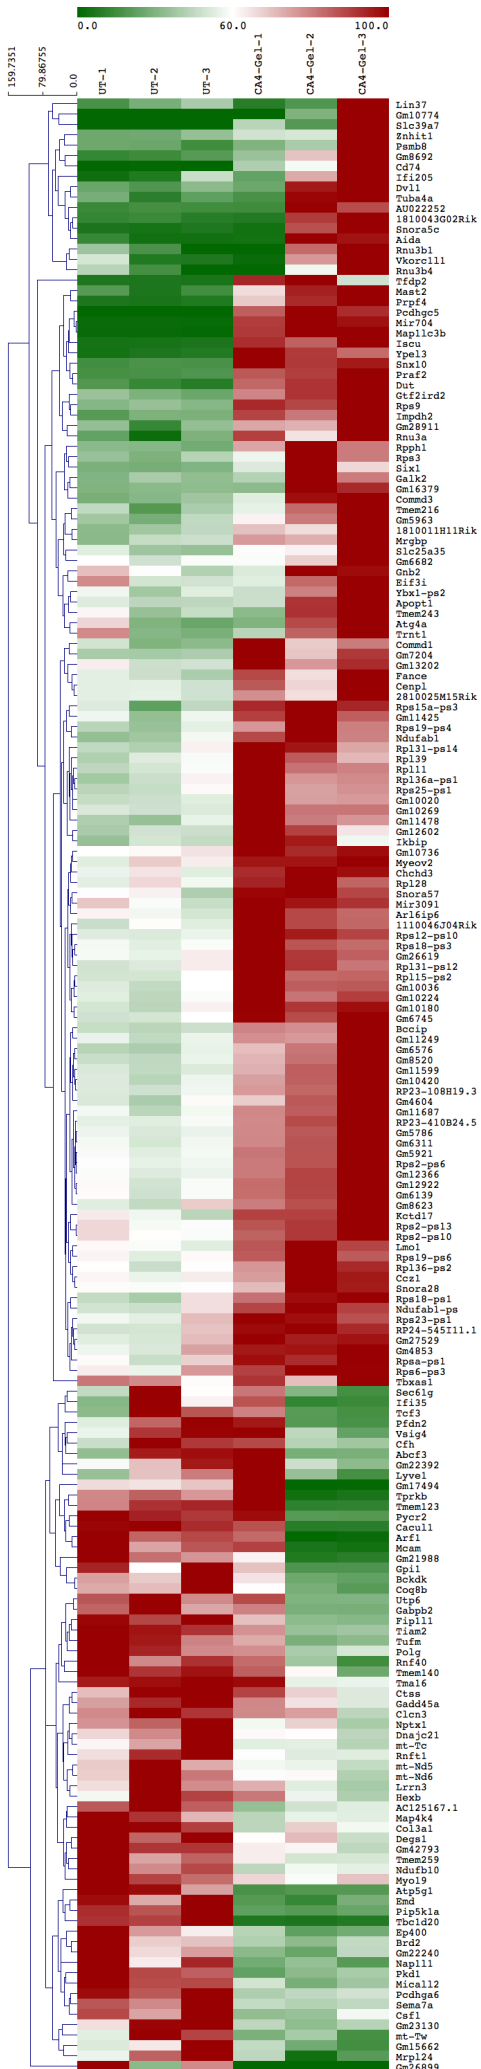

**Data Figure ES5.** Heat map showing differential gene expression on transcriptomic analysis of CA4-Gel treated tumors as compared to untreated (UT) tumors.

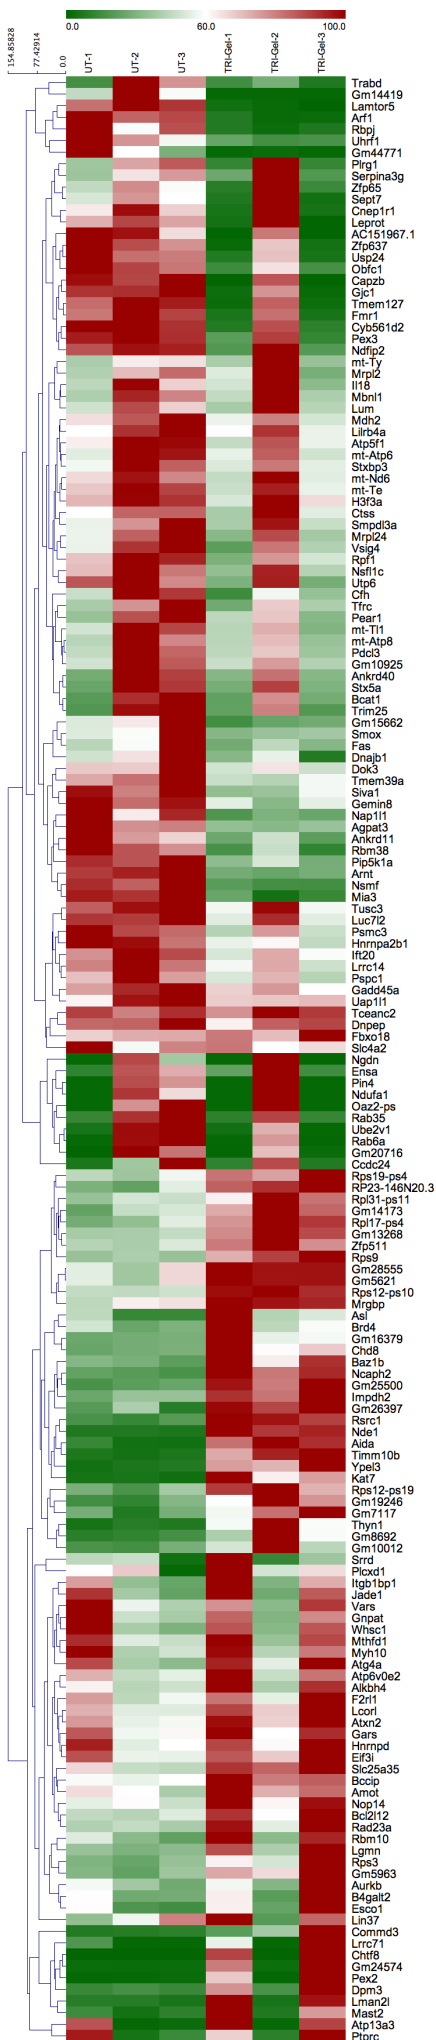

**Data Figure ES6.** Heat map showing differential gene expression on transcriptomic analysis of TRI-Gel treated tumors as compared to untreated (UT) tumors.

*G3bp1* (Event 1)

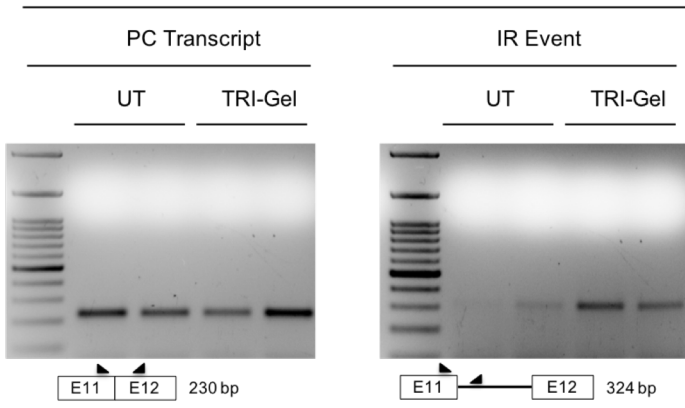

*G3bp1* (Event 2)

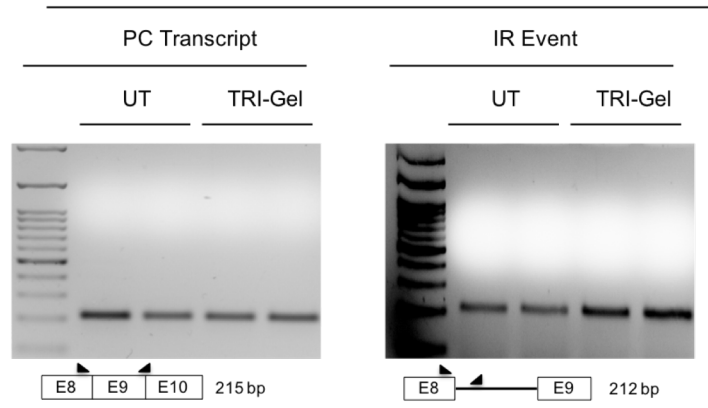

*Dennd6a*

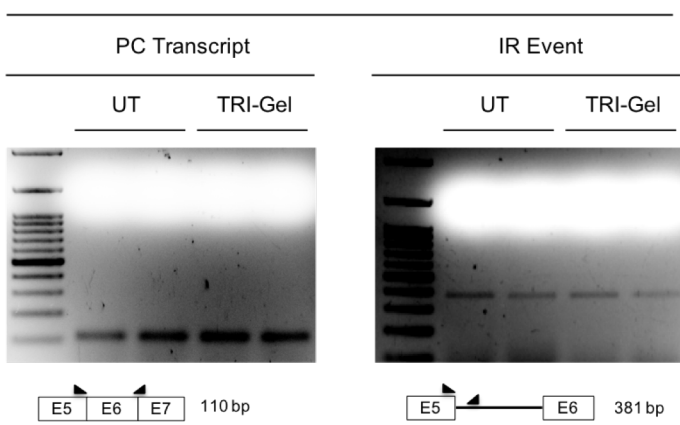

*Topbp1*

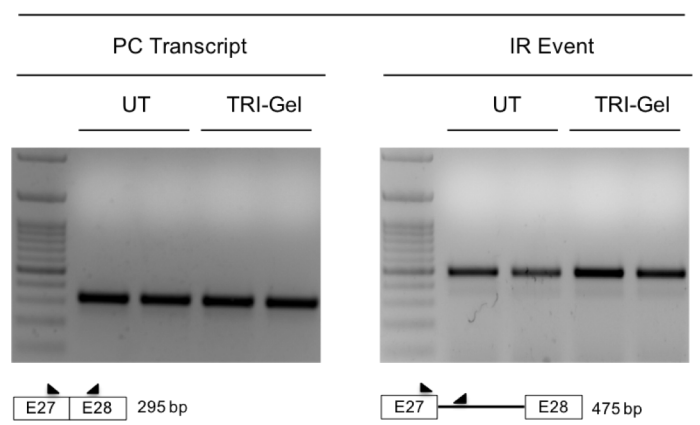

*Rplp0*

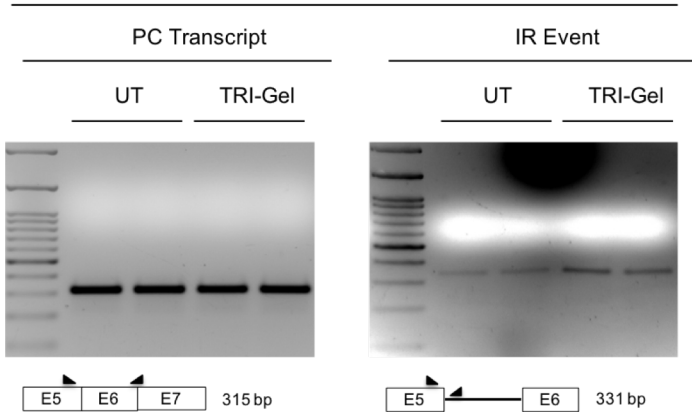

*Cct3*

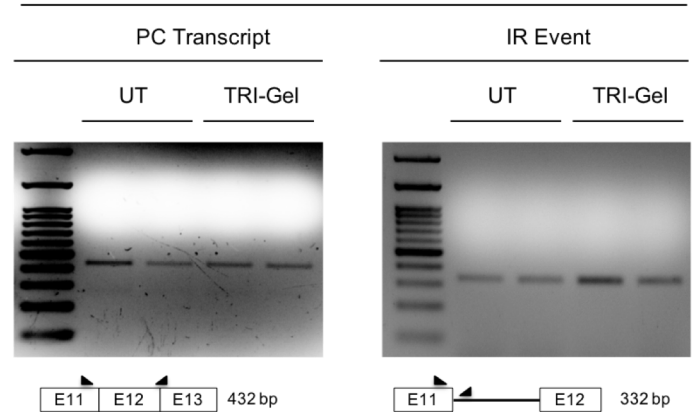

100 bp ladder

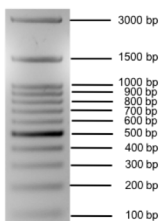

**Data Figure ES7.** Original gel pictures of Figure 4E showing validation of Alternative Splicing by semi-quantitative PCR.

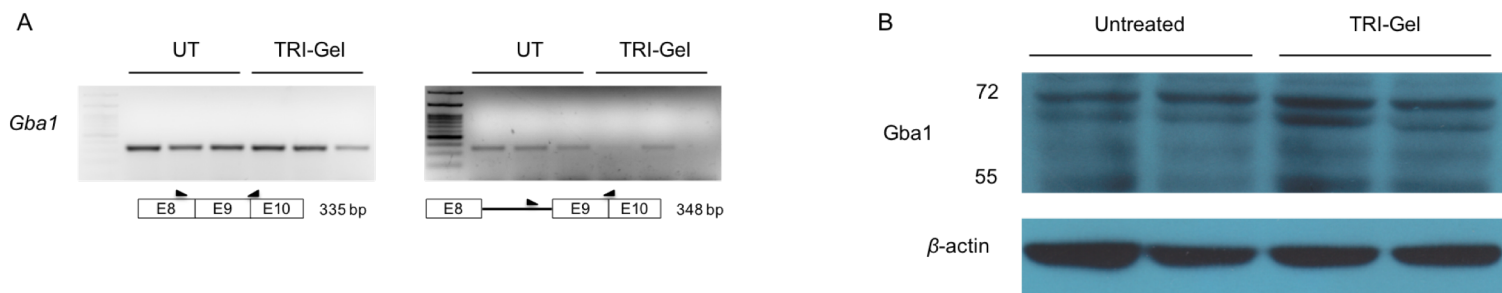

**Data Figure ES8. (A-B)** Original gel pictures of Figure 5B (A) showing validation of removal of intron 8 retention event in *Gba1* and of Figure 5E (B) showing original immunoblot of *Gba1*.
